# Supplementary material
Source: PubMed Central journal article supplement (PMC8459709)
Supplement: NIHMS1733130-supplement-Supple_figs_S1-S8_tables_S3_S5_S6.pdf [file NIHMS1733130-supplement-Supple_figs_S1-S8_tables_S3_S5_S6.pdf]

LymphGen  
subtype call:

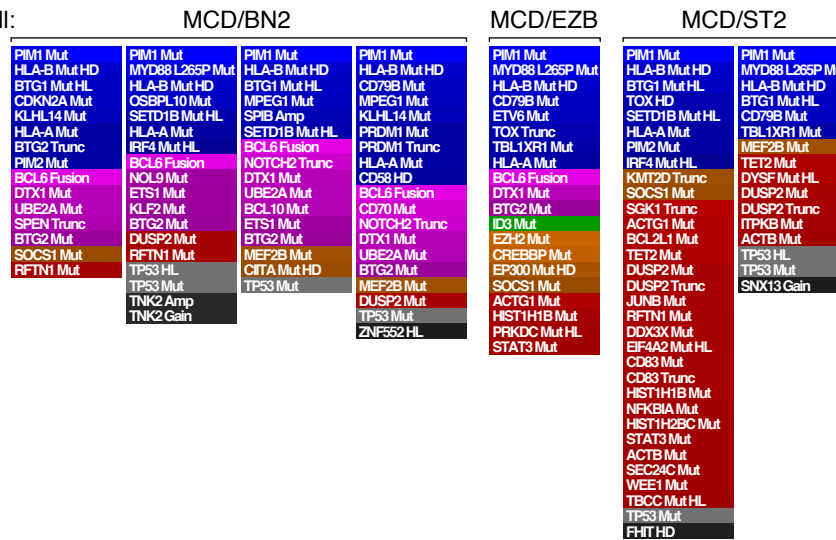

LymphGen  
subtype call:

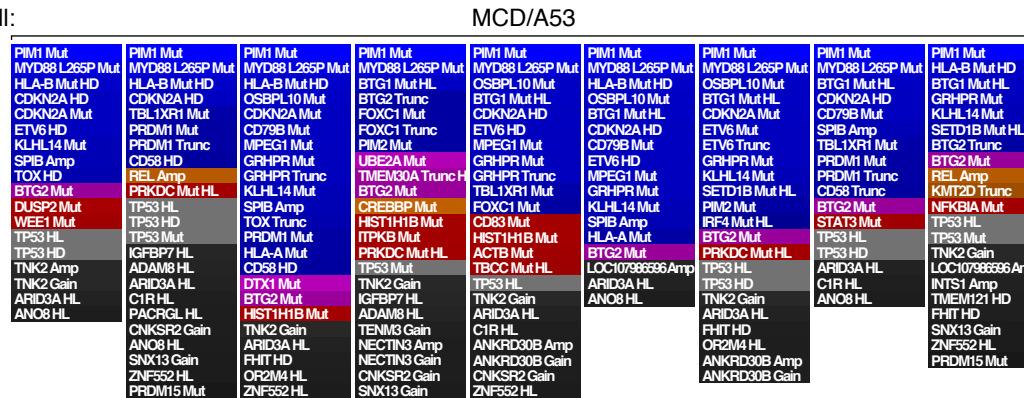

LymphGen  
subtype call:

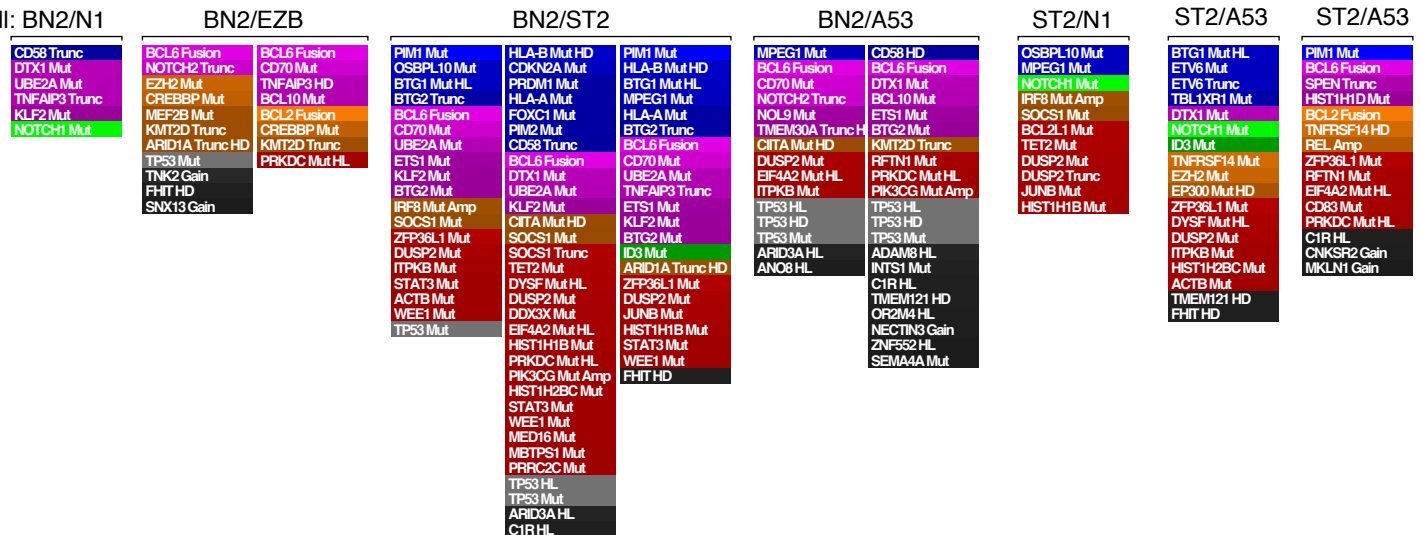

LymphGen  
subtype call:

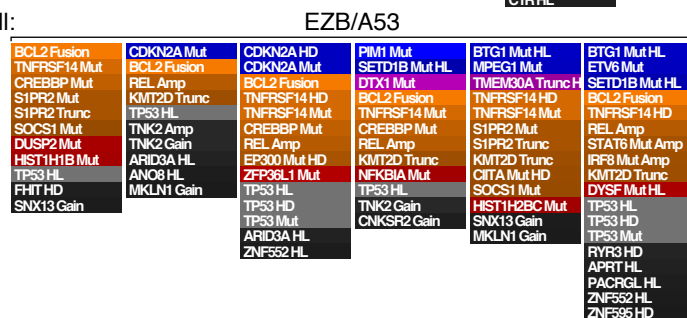

**Figure S1 (related to Figure 1)** Genetic features in genetically composite DLBCL tumors. Shown are genetic features in DLBCL tumors that have been classified into more than one subtype by the LymphGen algorithm (n=33). The significance of each genetic feature in the LymphGen model is presented according to the color scale at the right.



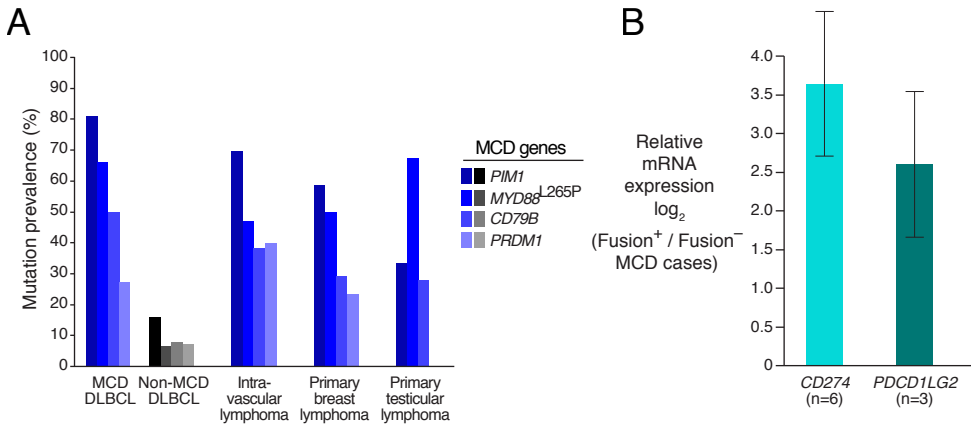

**Figure S3 (related to Figure 3).** **A.** Prevalence of the indicated MCD-defining mutations in primary testicular, primary breast and primary intravascular lymphomas. **B.** Relative expression of *CD274* mRNA, encoding PD-L1, and *PDCD1LG2* mRNA, encoding PD-L2, in MCD tumors with fusions of the respective genes versus other, fusion-negative MCD tumors.

|                          | NCI Cohort<br>(Schmitz et al) | Harvard Cohort<br>(Chapuy et al) | BCC Cohort<br>(Ennishi et al) |
|--------------------------|-------------------------------|----------------------------------|-------------------------------|
| # Patients               | 574                           | 304                              | 332                           |
| # Patients with survival | 240                           | 263                              | 332                           |
| FFPE cases               | 0%                            | 45%                              | 0%                            |
| Exome                    | +                             | +                                | -                             |
| Panel seq.               | 359 genes                     | -                                | 82 genes                      |
| CGH                      | Whole genome                  | Regional                         | Whole genome                  |
| Translocation            | +                             | +                                | +                             |
| COO                      | +                             | +                                | +                             |

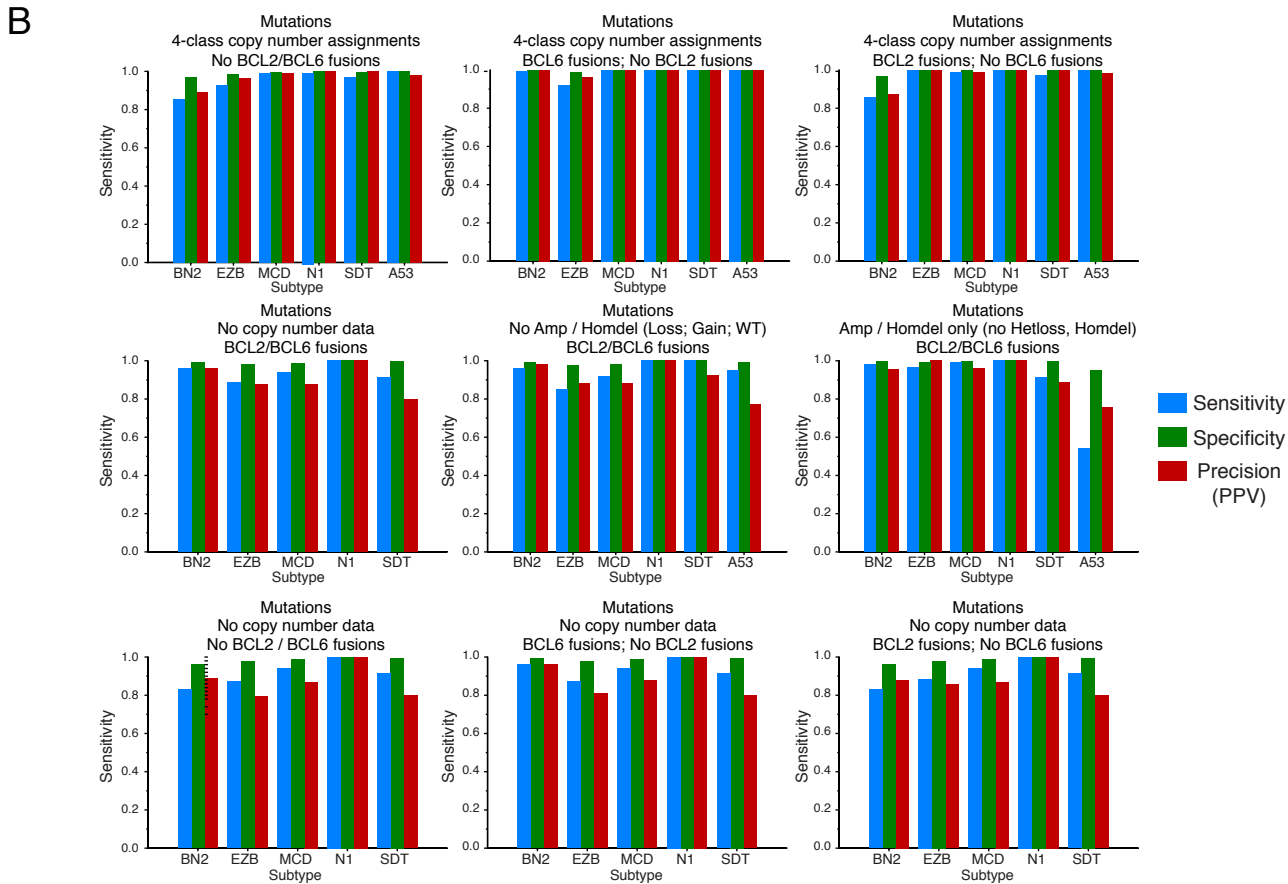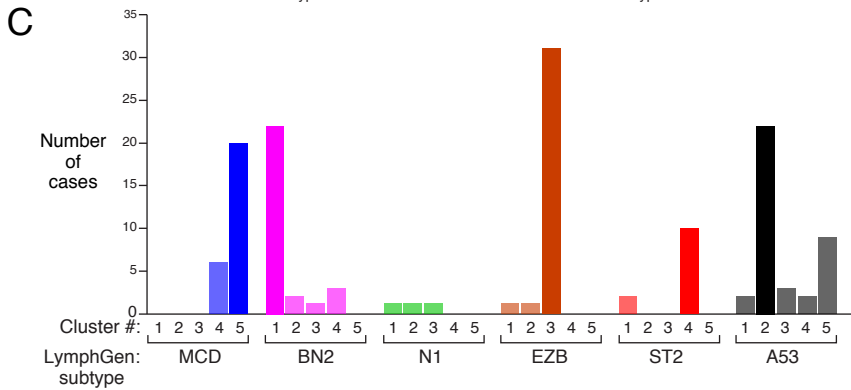

**Figure S4 (related to Figure 4).** **A.** Clinical and analytic aspects of the three DLBCL cohorts used in the present study (Chapuy et al., 2018; Ennishi et al., 2019a; Schmitz et al., 2018). **B.** Sensitivity, specificity and precision (positive predictive value (PPV)) for LymphGen predictor models based on the indicated availability of dataset types. Each plot is based on data from the NCI cohort and is a comparison with the LymphGen model based on a full complement of genetic data (mutations, 4-class copy number assignments (amplification, gain, heterozygous loss, homozygous deletion), and fusions (BCL2, BCL6)). Models lacking copy number data did not include A53 since this subtype is defined primarily by copy number alterations. **C.** Relationship between clusters defined in the Harvard cohort (Chapuy et al., 2018) and LymphGen-predicted subtypes. All LymphGen subtypes were predominantly composed of cases belonging to a single cluster, with the exception of cases in the N1 subtype, which were not assigned to a cluster.

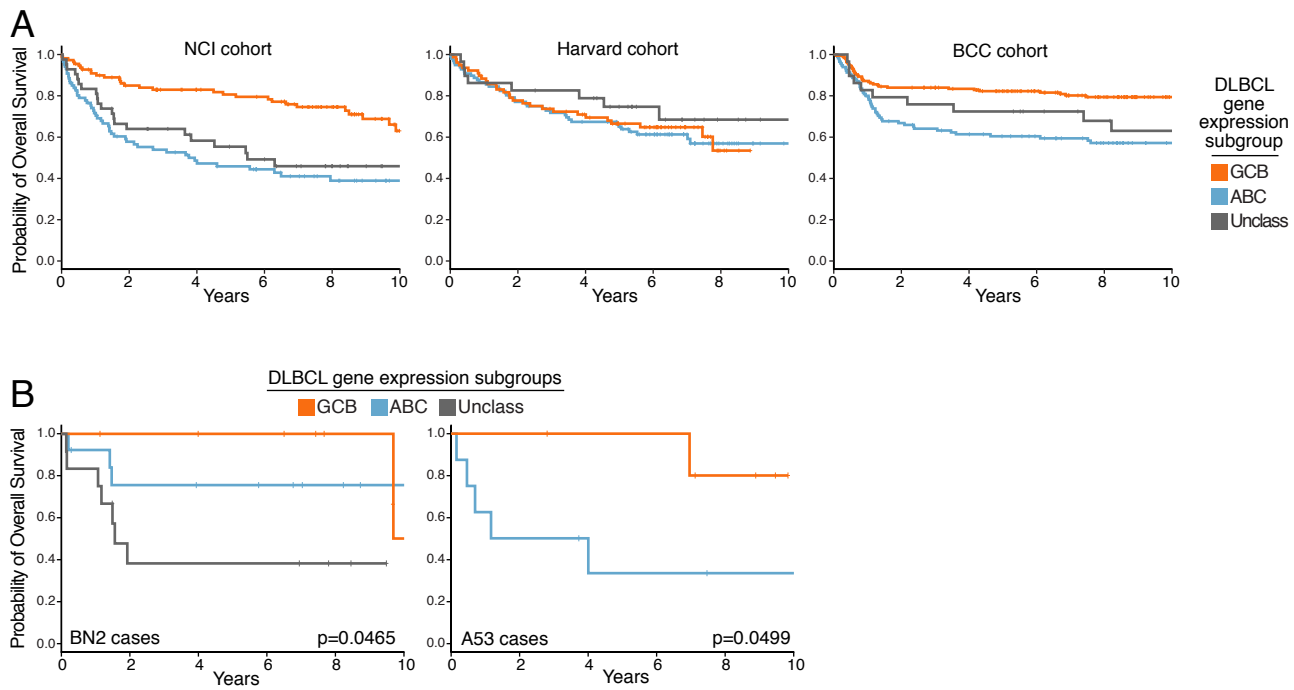

**Figure S5 (related to Figure 4).** **A.** Kaplan-Meier plots of overall survival in the indicated DLBCL cohorts according to COO gene expression subgroup. **B.** Kaplan-Meier plots of overall survival in the BN2 and A53 genetic subtypes according to COO gene expression subgroup within the NCI cohort.

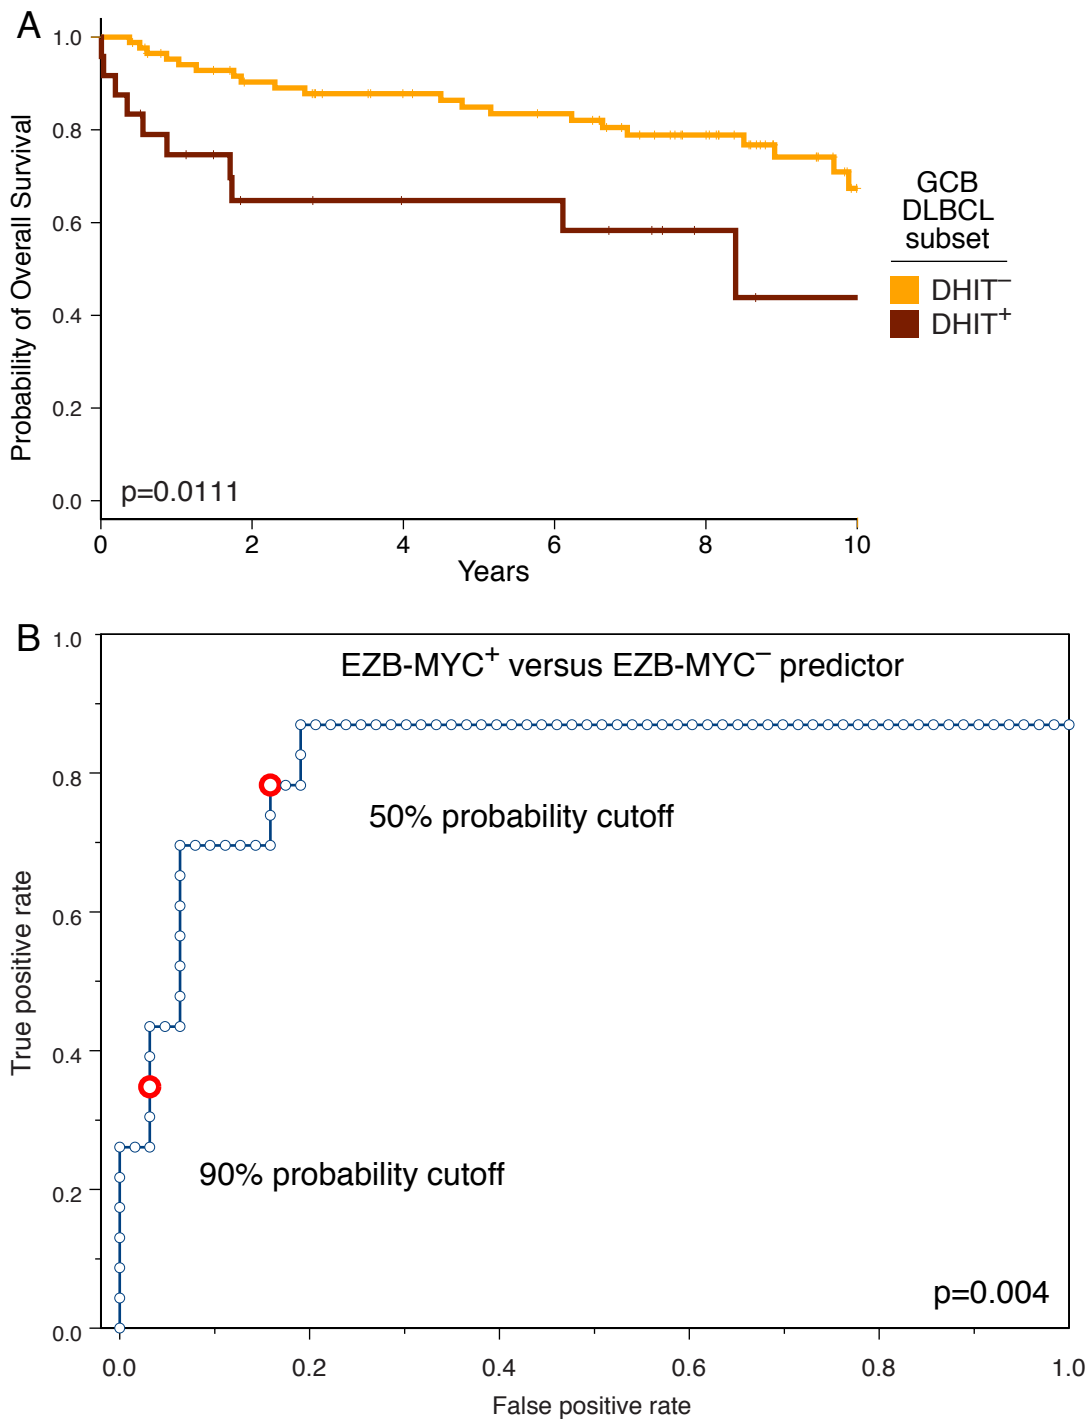

**Figure S6 (related to Figure 6).** **A.** Kaplan-Meier plot of overall survival of DHIT<sup>+</sup> and DHIT<sup>-</sup> subsets of GCB DLBCL. **B.** Receiver operating characteristic (ROC) curve for the binary probabilistic classifier of EZB-M<sup>+</sup> versus EZB-M<sup>-</sup>.

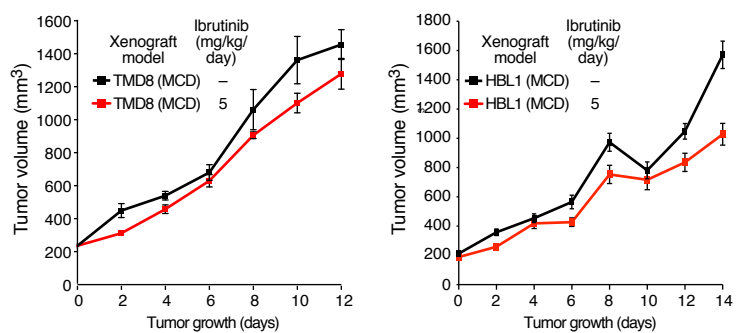

**Figure S7 (related to Figure 7).** Effect of low doses of ibrutinib (5 mg/kg/day) on growth of xenografts of two MCD models, TMD8 (left), and HBL1 (right).

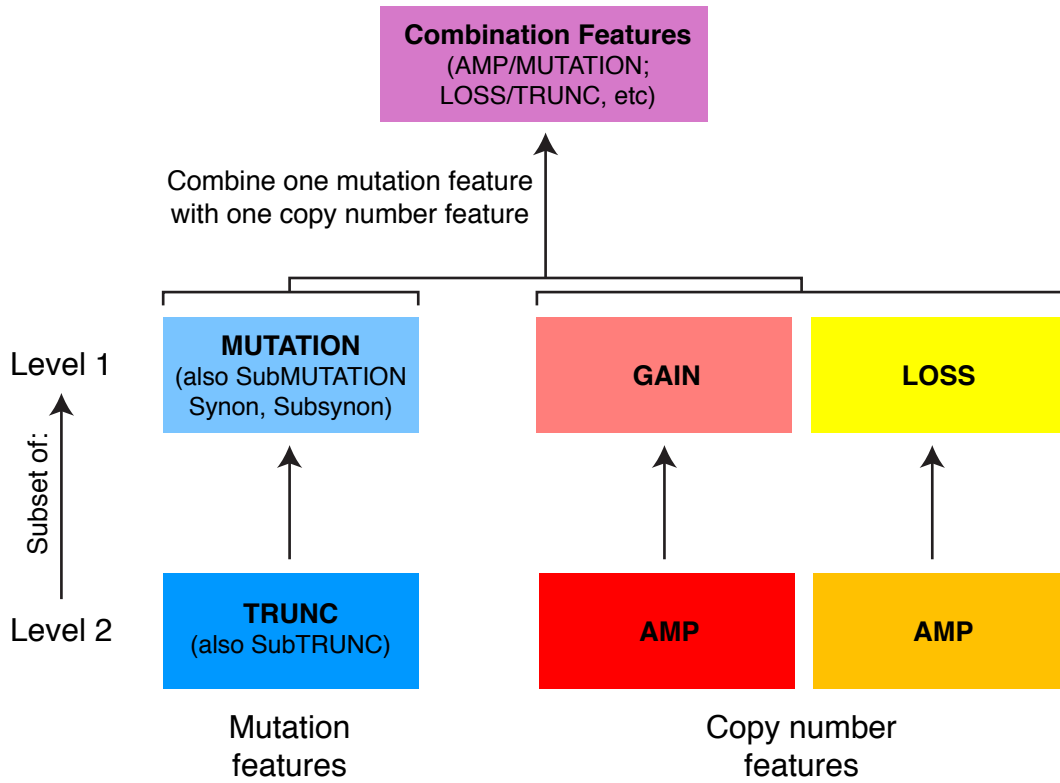

**Figure S8 (related to STAR methods).** Hierarchical organization of genetic features for use in the LymphGen algorithm.!



**Table S3:** Statistical analysis of subtype-defining genetic features in the Harvard and BCC cohorts. Related to Figure 4  
**Probability that subtype-defining genetic features co-occur**

| Subtype-defining features evaluated | Harvard cohort | BCA cohort |
|-------------------------------------|----------------|------------|
| BN2                                 | 5.97E-19       | 1.28E-09   |
| EZB                                 | 8.03E-16       | 3.21E-12   |
| MCD                                 | 1.13E-30       | 2.24E-19   |
| SDT                                 | 6.34E-07       | 5.08E-13   |

**Probability that TP53 mutation and/or deletion is associated with more copy number abnormalities**

| Harvard cohort | BCC cohort |
|----------------|------------|
| 1.07E-17       | 4.37E-09   |

**Table S5:** Gene expression signature averages and statistical associations with genetic subtypes. Related to Figure 6

| Short signature name | Signature                                            | Signature category           | Mean Value of Signature average within Subtype |        |        |          |          |        |        | P-value for difference in signature average between those within vs outside subtype |          |          |          |          |          |          |
|----------------------|------------------------------------------------------|------------------------------|------------------------------------------------|--------|--------|----------|----------|--------|--------|-------------------------------------------------------------------------------------|----------|----------|----------|----------|----------|----------|
|                      |                                                      |                              | MCD                                            | BN2    | N1     | EZB-MYC- | EZB-MYC+ | SDT    | A53    | MCD                                                                                 | BN2      | N1       | EZB-MYC- | EZB-MYC+ | SDT      | A53      |
| Prolif-11            | MCL_proliferation_survival                           | Malignant processes          | 0.349                                          | 0.009  | -0.656 | 0.492    | -0.475   | 0.009  | -0.173 | 2.80E-06                                                                            | 6.62E-02 | 8.69E-02 | 8.05E-03 | 6.22E-02 | 3.63E-01 | 9.41E-01 |
| MycUp-4              | Myc_CHIP_PET_Expr_Up                                 | Malignant processes          | 0.434                                          | 0.037  | -0.522 | 0.738    | -0.536   | -0.074 | 0.008  | 4.29E-07                                                                            | 1.66E-01 | 9.70E-02 | 4.67E-04 | 1.74E-03 | 8.99E-01 | 5.06E-01 |
| Ribo-1               | Ribosomal_protein                                    | Malignant processes          | 0.313                                          | 0.044  | 0.260  | 1.010    | 0.156    | 0.200  | 0.122  | 1.20E-01                                                                            | 2.68E-01 | 6.59E-01 | 8.42E-05 | 7.56E-01 | 7.97E-01 | 8.59E-01 |
| Quiesce-2            | Quiescence_heme_cluster1                             | Malignant processes          | -0.209                                         | 0.018  | 0.755  | -1.161   | -0.041   | -0.135 | -0.280 | 2.75E-02                                                                            | 9.81E-01 | 2.98E-03 | 7.44E-08 | 3.89E-01 | 4.23E-01 | 5.69E-02 |
| Glycol-1             | Glycolysis                                           | Malignant processes          | -0.045                                         | 0.155  | -0.407 | 0.525    | 0.116    | 0.600  | -0.212 | 7.67E-01                                                                            | 9.17E-02 | 1.29E-01 | 1.52E-02 | 2.58E-01 | 2.25E-03 | 2.27E-01 |
| Lipid-1              | Lipid_enzyme_Node3152                                | Malignant processes          | -0.310                                         | -0.002 | -0.292 | 0.916    | 0.263    | -0.019 | -0.052 | 3.05E-04                                                                            | 6.32E-01 | 1.54E-01 | 1.06E-05 | 2.92E-02 | 7.39E-01 | 5.29E-01 |
| GCB-1                | GC_B_cell_U133Plus                                   | B cell differentiation       | -0.414                                         | 0.414  | -0.554 | 1.407    | 1.200    | 0.604  | -0.150 | 7.59E-10                                                                            | 4.40E-02 | 1.90E-03 | 2.83E-10 | 3.93E-17 | 4.81E-02 | 1.96E-02 |
| GCB-8                | scGC_cluster1_LZ                                     | B cell differentiation       | -0.211                                         | 0.122  | -0.249 | 0.185    | 0.566    | 0.356  | -0.034 | 6.28E-02                                                                            | 3.02E-01 | 3.61E-01 | 3.20E-01 | 9.60E-05 | 1.14E-01 | 8.09E-01 |
| GCB-9                | scGC_cluster1_IZ                                     | B cell differentiation       | 0.149                                          | 0.111  | 0.072  | 1.386    | 0.415    | 0.162  | 0.022  | 8.92E-01                                                                            | 8.18E-01 | 8.12E-01 | 3.99E-09 | 1.09E-02 | 8.88E-01 | 4.96E-01 |
| GCB-10               | scGC_cluster1_DZ                                     | B cell differentiation       | 0.319                                          | 0.178  | -0.194 | 1.146    | 0.085    | 0.152  | -0.009 | 3.48E-02                                                                            | 3.78E-01 | 2.73E-01 | 2.05E-06 | 7.89E-01 | 7.60E-01 | 5.49E-01 |
| PC-1                 | Plasma_cell_gt_mature_Bcell                          | B cell differentiation       | -0.498                                         | 0.077  | 0.264  | -1.247   | -0.035   | 0.385  | -0.340 | 3.46E-05                                                                            | 1.13E-01 | 1.71E-01 | 8.35E-08 | 9.58E-01 | 1.67E-02 | 8.88E-02 |
| Bcell-6              | Memory_B_CCR6pos_Memory_B_precursor_gt_DZ_CCR6neg_LZ | B cell differentiation       | -0.023                                         | 0.040  | 1.142  | -1.415   | -0.697   | -0.443 | -0.076 | 5.73E-01                                                                            | 2.14E-01 | 1.80E-06 | 2.33E-10 | 1.59E-07 | 7.52E-02 | 9.60E-01 |
| IRF4Up-7             | IRF4_ABC_induced_ABCDLBCL                            | B cell transcription factors | 0.707                                          | 0.041  | 0.100  | -2.145   | -1.070   | -0.729 | 0.278  | 3.60E-18                                                                            | 6.13E-02 | 3.33E-01 | 9.81E-28 | 4.96E-21 | 1.16E-03 | 6.70E-03 |
| IRF4Dn-1             | IRF4_ABC_repressed_GCBDLBCL                          | B cell transcription factors | -0.658                                         | 0.365  | -0.519 | 1.472    | 1.161    | 0.627  | -0.204 | 5.55E-15                                                                            | 2.83E-02 | 8.18E-03 | 5.46E-12 | 4.02E-18 | 1.56E-02 | 2.76E-02 |
| OCT2Up-1             | OCT2_shRNA_OCT2_CHIP                                 | B cell transcription factors | 0.403                                          | 0.121  | -0.776 | 0.517    | -0.553   | -0.297 | -0.089 | 1.72E-07                                                                            | 3.95E-03 | 2.47E-02 | 5.73E-03 | 1.08E-02 | 5.60E-01 | 6.11E-01 |
| BCL6Dn-1             | BCL6_repressed                                       | B cell transcription factors | 0.300                                          | -0.032 | 0.502  | -1.367   | -0.317   | -0.181 | -0.403 | 1.57E-03                                                                            | 9.44E-01 | 3.50E-02 | 1.99E-09 | 9.24E-03 | 4.77E-01 | 2.55E-02 |
| TCF3Up-1             | TCF3_BI_up                                           | B cell transcription factors | -0.552                                         | 0.111  | -0.473 | 0.368    | 0.421    | 0.322  | -0.378 | 2.17E-08                                                                            | 2.44E-01 | 4.73E-02 | 4.94E-02 | 4.59E-04 | 8.71E-02 | 1.24E-02 |
| NFkB-10              | NFkB_Up_HBL1                                         | Oncogenic signaling pathways | 0.332                                          | 0.169  | -0.220 | -2.612   | -0.315   | 0.024  | -0.114 | 1.24E-04                                                                            | 8.21E-03 | 7.12E-01 | 2.74E-26 | 2.14E-02 | 5.20E-01 | 9.92E-01 |
| p53up-1              | p53_up_Xray                                          | Oncogenic signaling pathways | 0.123                                          | 0.394  | 0.141  | 0.459    | 0.266    | 0.368  | -0.706 | 6.36E-01                                                                            | 1.20E-03 | 7.90E-01 | 7.15E-02 | 1.14E-01 | 1.40E-01 | 1.77E-06 |
| NotchUp-6            | Notch_CLL_up_2x_Fabbri                               | Oncogenic signaling pathways | -0.651                                         | 0.203  | 0.721  | -0.984   | 0.279    | 0.211  | -0.393 | 3.06E-10                                                                            | 7.33E-03 | 1.19E-03 | 1.25E-05 | 1.73E-02 | 1.71E-01 | 1.82E-02 |
| PI3KUp-1             | PI3K_overexpression_up                               | Oncogenic signaling pathways | 0.249                                          | 0.162  | -0.079 | -0.044   | 0.401    | 0.823  | -0.289 | 2.17E-01                                                                            | 5.39E-01 | 5.89E-01 | 7.26E-01 | 5.39E-02 | 2.16E-03 | 5.47E-02 |
| JAK2Up-2             | JAK2_PMBL_gt_GCB                                     | Oncogenic signaling pathways | -0.128                                         | 0.114  | 0.336  | -1.504   | 0.189    | 0.796  | -0.544 | 2.57E-01                                                                            | 3.26E-01 | 2.44E-01 | 1.39E-09 | 3.74E-01 | 3.12E-04 | 2.12E-03 |
| JAKUp-1              | JAK_IL10_Ly10_Up                                     | Oncogenic signaling pathways | 0.319                                          | 0.079  | -0.052 | -1.978   | -0.355   | -0.353 | -0.268 | 1.18E-05                                                                            | 1.96E-02 | 6.92E-01 | 5.55E-16 | 3.06E-02 | 3.27E-01 | 4.95E-01 |
| GCThUp-1             | GC_T_helper_up_Chtanova_and_Kim                      | Tumor microenvironment       | -0.534                                         | 0.123  | 0.558  | 0.199    | 0.593    | 0.032  | -0.586 | 6.44E-07                                                                            | 2.57E-01 | 3.60E-02 | 2.66E-01 | 1.07E-05 | 9.06E-01 | 3.43E-04 |
| CD4T-2               | CD4_T_cell_naive_Newman                              | Tumor microenvironment       | -0.285                                         | -0.050 | 0.534  | -0.662   | 0.156    | -0.072 | -0.508 | 4.61E-03                                                                            | 6.75E-01 | 1.74E-02 | 2.25E-03 | 2.20E-01 | 7.41E-01 | 6.48E-04 |
| CD8T-7               | CD8_T_cell_Newman                                    | Tumor microenvironment       | -0.186                                         | -0.186 | 0.373  | -0.704   | 0.032    | -0.178 | -0.560 | 2.82E-01                                                                            | 2.42E-01 | 6.17E-02 | 5.07E-03 | 4.89E-01 | 5.90E-01 | 1.53E-03 |
| Treg-1               | Regulatory_T_cell_McHugh_Herman_concensus            | Tumor microenvironment       | 0.050                                          | -0.107 | 0.281  | -1.505   | 0.053    | 0.097  | -0.581 | 3.00E-01                                                                            | 7.26E-01 | 2.03E-01 | 8.98E-09 | 6.18E-01 | 4.36E-01 | 3.44E-03 |
| NK-3                 | NK_cell_resting_Newman                               | Tumor microenvironment       | -0.094                                         | -0.176 | 0.454  | -0.953   | 0.019    | -0.262 | -0.501 | 7.72E-01                                                                            | 2.39E-01 | 3.58E-02 | 9.27E-05 | 6.96E-01 | 3.02E-01 | 5.23E-03 |
| MPhage-1             | Macrophage_M1_Newman                                 | Tumor microenvironment       | 0.159                                          | 0.157  | 0.347  | -0.874   | 0.053    | 0.204  | -0.346 | 3.48E-01                                                                            | 3.21E-01 | 2.46E-01 | 2.09E-05 | 7.12E-01 | 4.60E-01 | 8.46E-03 |
| MPhage-2             | Macrophage_M2_Newman                                 | Tumor microenvironment       | -0.013                                         | 0.098  | 0.357  | -0.853   | 0.009    | 0.083  | -0.463 | 9.22E-01                                                                            | 2.80E-01 | 1.38E-01 | 9.02E-05 | 8.65E-01 | 6.48E-01 | 2.75E-03 |
| DC-9                 | Dendritic_cell_activated_Newman                      | Tumor microenvironment       | -0.241                                         | 0.105  | 0.149  | -0.979   | 0.089    | 0.207  | -0.509 | 7.70E-02                                                                            | 8.19E-02 | 3.97E-01 | 4.17E-05 | 3.62E-01 | 1.62E-01 | 3.76E-03 |
| Stromal-1            | Stromal-1_DLBCl_survival_predictor                   | Tumor microenvironment       | -0.522                                         | 0.195  | -0.083 | -0.126   | 0.705    | 0.414  | -0.289 | 1.09E-07                                                                            | 1.12E-01 | 6.36E-01 | 6.93E-01 | 3.19E-07 | 5.80E-02 | 4.28E-02 |

**Table S6:** Subtype-defining genetic features in DLBCL subtype cell line models. Related to Figure 7

| Cell line model | Gene symbol | ENTREZ_ID | Chromosome | Chromosomal    |            | Original Base pair | New Base pair | Amino acid change | Mutation type category | Genetic subtype feature |
|-----------------|-------------|-----------|------------|----------------|------------|--------------------|---------------|-------------------|------------------------|-------------------------|
|                 |             |           |            | start position | Chromosome |                    |               |                   |                        |                         |
| TMD8            | BTG2        | 7832      | 1          | 203276274      |            | G                  | A             | G62D              | Missense               | MCD                     |
| TMD8            | CD79B       | 974       | 17         | 62006799       |            | A                  | G             | Y196H             | Missense               | MCD                     |
| TMD8            | EIF4A2      | 1974      | 3          | 186504979      |            | T                  | G             | F279V             | Missense               | ST2                     |
| TMD8            | ETV6        | 2120      | 12         | 11803049       |            | C                  | G             |                   | 5UTR                   | MCD                     |
| TMD8            | GRHPR       | 9380      | 9          | 37424855       |            | C                  | T             | Q33X              | Nonsense               | MCD                     |
| TMD8            | IRF4        | 3662      | 6          | 393318         |            | C                  | T             | H56Y              | Missense               | MCD                     |
| TMD8            | MPEG1       | 219972    | 11         | 58979380       |            | G                  | A             | P320L             | Missense               | MCD                     |
| TMD8            | MPEG1       | 219972    | 11         | 58978740       |            | G                  | C             | S533R             | Missense               | MCD                     |
| TMD8            | MYD88       | 4615      | 3          | 38182641       |            | T                  | C             | L265P             | Missense               | MCD                     |
| TMD8            | PIM1        | 5292      | 6          | 37138332       |            | C                  | T             | A85V              | Missense               | MCD                     |
| TMD8            | PIM1        | 5292      | 6          | 37138375       |            | G                  | A             | S99S              | Synonymous             | MCD                     |
| TMD8            | PIM1        | 5292      | 6          | 37138577       |            | G                  | C             | Q128H             | Missense               | MCD                     |
| TMD8            | PIM1        | 5292      | 6          | 37138580       |            | C                  | A             | Y129X             | Nonsense               | MCD                     |
| TMD8            | PIM1        | 5292      | 6          | 37138581       |            | C                  | T             | Q130X             | Nonsense               | MCD                     |
| TMD8            | PIM1        | 5292      | 6          | 37138804       |            | G                  | C             | E170D             | Missense               | MCD                     |
| TMD8            | PIM1        | 5292      | 6          | 37138908       |            | G                  | A             | G174D             | Missense               | MCD                     |
| TMD8            | PIM1        | 5292      | 6          | 37139039       |            | C                  | G             | Q218E             | Missense               | MCD                     |
| TMD8            | PIM1        | 5292      | 6          | 37139068       |            | G                  | T             | R227S             | Missense               | MCD                     |
| TMD8            | PIM1        | 5292      | 6          | 37140860       |            | G                  | C             | L323L             | Synonymous             | MCD                     |
| TMD8            | PRDM1       | 639       | 6          | 106536324      |            | G                  | C             | E97D              | Missense               | MCD                     |
| TMD8            | PRKCB       | 5579      | 16         | 24183646       |            | T                  | C             | I432T             | Missense               | BN2                     |
| TMD8            | TOX         | 9760      | 8          | 59750871       |            | C                  | G             |                   | Splice                 | MCD                     |
| HBL1            | ACTB        | 60        | 7          | 5569224        |            | G                  | A             | A22V              | Missense               | ST2                     |
| HBL1            | CD79B       | 974       | 17         | 62006798       |            | T                  | A             | Y196F             | Missense               | MCD                     |
| HBL1            | DDX3X       | 1654      | X          | 41206603       |            | G                  | A             | R603Q             | Missense               | ST2                     |
| HBL1            | IRF2BP2     | 359948    | 1          | 234744941      |            | G                  | T             | G100G             | Synonymous             | N1                      |
| HBL1            | MYD88       | 4615      | 3          | 38182641       |            | T                  | C             | L265P             | Missense               | MCD                     |
| HBL1            | NOL9        | 79707     | 1          | 6586772        |            | C                  | A             | C648F             | Missense               | BN2                     |
| HBL1            | PIM1        | 5292      | 6          | 37138424       |            | C                  | T             | L116L             | Synonymous             | MCD                     |
| HBL1            | TBL1XR1     | 79718     | 3          | 176755958      |            | A                  | C             | N350K             | Missense               | MCD                     |
| HBL1            | TP53        | 7157      | 17         | 7578460        |            | A                  | G             | V157A             | Missense               | A53                     |
| OCI-Ly10        | ACTG1       | 71        | 17         | 79477761       |            | C                  | G             | E361D             | Missense               | ST2                     |
| OCI-Ly10        | BCL2        | 596       | 18         | 60985644       |            | G                  | A             | L86F              | Missense               | EZB                     |
| OCI-Ly10        | BCOR        | 54880     | X          | 39930325       |            | T                  | A             | S1047C            | Missense               | N1                      |
| OCI-Ly10        | BTG1        | 694       | 12         | 92539167       |            | C                  | T             | A49T              | Missense               | MCD                     |
| OCI-Ly10        | DDX3X       | 1654      | X          | 41205767       |            | A                  | G             | R503G             | Missense               | ST2                     |
| OCI-Ly10        | ETS1        | 2113      | 11         | 128354716      |            | A                  | G             |                   | Splice                 | BN2                     |
| OCI-Ly10        | GRHPR       | 9380      | 9          | 37424937       |            | C                  | T             | S60F              | Missense               | MCD                     |
| OCI-Ly10        | HLA-B       | 3106      | 6          | 31324049       |            | C                  | A             | E172X             | Nonsense               | MCD                     |
| OCI-Ly10        | HLA-C       | 3107      | 6          | 31238865       |            | TCTCCTTCC          | D             | Y195fs            | Frameshift             | MCD                     |
| OCI-Ly10        | IRF2BP2     | 359948    | 1          | 234744673      |            | G                  | T             | P190T             | Missense               | N1                      |
| OCI-Ly10        | IRF2BP2     | 359948    | 1          | 234744355      |            | G                  | A             | Q296X             | Nonsense               | N1                      |
| OCI-Ly10        | IRF4        | 3662      | 6          | 393243         |            | C                  | G             | Q31E              | Missense               | MCD                     |
| OCI-Ly10        | JUNB        | 3726      | 19         | 12902699       |            | C                  | T             | S38S              | Synonymous             | ST2                     |
| OCI-Ly10        | MPEG1       | 219972    | 11         | 58980200       |            | G                  | A             | P47S              | Missense               | MCD                     |
| OCI-Ly10        | MPEG1       | 219972    | 11         | 58978788       |            | G                  | A             | D517D             | Synonymous             | MCD                     |
| OCI-Ly10        | MYD88       | 4615      | 3          | 38182641       |            | T                  | C             | L265P             | Missense               | MCD                     |
| OCI-Ly10        | PIM1        | 5292      | 6          | 37138568       |            | G                  | A             | L125L             | Synonymous             | MCD                     |
| OCI-Ly10        | PIM1        | 5292      | 6          | 37138649       |            | C                  | T             | N152N             | Synonymous             | MCD                     |
| OCI-Ly10        | PIM1        | 5292      | 6          | 37138791       |            | C                  | T             | S166F             | Missense               | MCD                     |

|           |           |           |    |           |      |   |         |               |     |
|-----------|-----------|-----------|----|-----------|------|---|---------|---------------|-----|
| OCI-Ly10  | PIM1      | 5292      | 6  | 37138923  | T    | G | M179R   | Missense      | MCD |
| OCI-Ly10  | PIM1      | 5292      | 6  | 37139038  | G    | A | V217V   | Synonymous    | MCD |
| OCI-Ly10  | PIM1      | 5292      | 6  | 37139053  | C    | T | D222D   | Synonymous    | MCD |
| OCI-Ly10  | PIM2      | 11040     | X  | 48776062  | G    | A | T17M    | Missense      | MCD |
| OCI-Ly10  | PPP1R9B   | 84687     | 17 | 48227539  | C    | T | K112K   | Synonymous    | MCD |
| OCI-Ly10  | PRDM1     | 639       | 6  | 106536324 | G    | C | E97D    | Missense      | MCD |
| OCI-Ly10  | PRDM1     | 639       | 6  | 106552781 | G    | D | S249fs  | Frameshift    | MCD |
| OCI-Ly10  | TOX       | 9760      | 8  | 60031524  | GGTG | D | P7fs    | Frameshift    | MCD |
| OCI-Ly10  | TP53      | 7157      | 17 | 7578406   | C    | T | R175H   | Missense      | A53 |
| RIVA      | BCL6      |           | 3  |           |      |   |         | Translocation | BN2 |
| RIVA      | ARID1A    | 8289      | 1  | 27057712  | C    | T | Q474X   | Nonsense      | EZB |
| RIVA      | CREBBP    | 1387      | 16 | 3790455   | G    | A | R1360X  | Nonsense      | EZB |
| RIVA      | HLA-A     | 3105      | 6  | 29912011  | I    | T | G245fs  | Frameshift    | MCD |
| RIVA      | NOTCH2    | 4853      | 1  | 120458147 | G    | A | R2400X  | Nonsense      | BN2 |
| RIVA      | TP53      | 7157      | 17 | 7578535   | T    | C | K132R   | Missense      | A53 |
| RIVA      | TP53      | 7157      | 17 | 7577058   | C    | A | E294X   | Nonsense      | A53 |
| OCI-Ly1   | BCL2      |           |    |           |      |   |         | Translocation | BN2 |
| OCI-Ly1   | ACTB      | 60        | 7  | 5568262   | A    | C | I151S   | Missense      | ST2 |
| OCI-Ly1   | B2M       | 567       | 15 | 45003746  | T    | C | M1?     | StartLost     | A53 |
| OCI-Ly1   | B2M       | 567       | 15 | 45003750  | T    | G | S2S     | Synonymous    | A53 |
| OCI-Ly1   | B2M       | 567       | 15 | 45007845  | T    | A | Y98N    | Missense      | A53 |
| OCI-Ly1   | BCL2      | 596       | 18 | 60985508  | G    | A | A131V   | Missense      | EZB |
| OCI-Ly1   | BCL2      | 596       | 18 | 60985417  | G    | A | S161S   | Synonymous    | EZB |
| OCI-Ly1   | BCL2      | 596       | 18 | 60985340  | G    | A | T187I   | Missense      | EZB |
| OCI-Ly1   | EZH2      | 2146      | 7  | 148508728 | A    | T | Y641N   | Missense      | EZB |
| OCI-Ly1   | FBXO11    | 80204     | 2  | 48045993  | T    | C | Y644C   | Missense      | EZB |
| OCI-Ly1   | FBXO11    | 80204     | 2  | 48035377  | I    | A | D889fs  | Frameshift    | EZB |
| OCI-Ly1   | GNA13     | 10672     | 17 | 63052611  | A    | G | I34T    | Missense      | EZB |
| OCI-Ly1   | GNA13     | 10672     | 17 | 63010919  | A    | T | L197Q   | Missense      | EZB |
| OCI-Ly1   | HIST1H2BK | 85236     | 6  | 27114367  | A    | G | F71L    | Missense      | BN2 |
| OCI-Ly1   | HIST1H2BK | 85236     | 6  | 27114326  | G    | A | Y84Y    | Synonymous    | BN2 |
| OCI-Ly1   | S1PR2     | 9294      | 19 | 10334849  | A    | G | C245R   | Missense      | EZB |
| OCI-Ly1   | S1PR2     | 9294      | 19 | 10334814  | G    | C | D256E   | Missense      | EZB |
| OCI-Ly1   | S1PR2     | 9294      | 19 | 10334768  | A    | T | Y272N   | Missense      | EZB |
| OCI-Ly1   | TP53      | 7157      | 17 | 7578457   | C    | T | R158H   | Missense      | A53 |
| OCI-Ly1   | TP53      | 7157      | 17 | 7578404   | A    | C | C176G   | Missense      | A53 |
| SUDHL4    | BCL2      |           |    |           |      |   |         | Translocation | EZB |
| SUDHL4    | ACTB      | 60        | 7  | 5567998   | C    | T | S239N   | Missense      | ST2 |
| SUDHL4    | BCL2      | 596       | 18 | 60985765  | T    | C | A45A    | Synonymous    | EZB |
| SUDHL4    | BCL2      | 596       | 18 | 60985747  | G    | C | S51S    | Synonymous    | EZB |
| SUDHL4    | BCL2      | 596       | 18 | 60985725  | G    | T | P59T    | Missense      | EZB |
| SUDHL4    | BCL2      | 596       | 18 | 60985549  | G    | C | S117R   | Missense      | EZB |
| SUDHL4    | CIITA     | 4261      | 16 | 10997689  | C    | T | P292S   | Missense      | EZB |
| SUDHL4    | CIITA     | 4261      | 16 | 11001899  | G    | D | A851fs  | Frameshift    | EZB |
| SUDHL4    | DDX3X     | 1654      | X  | 41205581  | A    | T | H472L   | Missense      | ST2 |
| SUDHL4    | EZH2      | 2146      | 7  | 148508727 | T    | G | Y641S   | Missense      | EZB |
| SUDHL4    | GNAI2     | 2771      | 3  | 50294456  | AAG  | D | K272del | Indel         | EZB |
| SUDHL4    | MEF2B     | 100271849 | 19 | 19260045  | T    | A | D83V    | Missense      | EZB |
| SUDHL4    | PIM1      | 5292      | 6  | 37138308  | G    | A | S77N    | Missense      | MCD |
| SUDHL4    | PTEN      | 5728      | 10 | 89692918  | G    | A | M134I   | Missense      | EZB |
| SUDHL4    | TNFRSF14  | 8764      | 1  | 2489824   | T    | G | V74G    | Missense      | EZB |
| SUDHL4    | TP53      | 7157      | 17 | 7577121   | G    | A | R273C   | Missense      | A53 |
| WSU-DLCL2 | BCL2      |           |    |           |      |   |         | Translocation | EZB |
| WSU-DLCL2 | BCL2      | 596       | 18 | 60985960  | G    | A | 5UTR    |               | EZB |

|                  |       |    |           |   |   |       |            |     |
|------------------|-------|----|-----------|---|---|-------|------------|-----|
| WSU-DLCL2 BCL2   | 596   | 18 | 60985931  | G | A |       | 5UTR       | EZB |
| WSU-DLCL2 BCL2   | 596   | 18 | 60985869  | T | G | N11H  | Missense   | EZB |
| WSU-DLCL2 BCL2   | 596   | 18 | 60985861  | C | G | E13D  | Missense   | EZB |
| WSU-DLCL2 BCL2   | 596   | 18 | 60985725  | G | C | P59A  | Missense   | EZB |
| WSU-DLCL2 BCL2   | 596   | 18 | 60985705  | C | G | P65P  | Synonymous | EZB |
| WSU-DLCL2 BCL2   | 596   | 18 | 60985695  | T | G | T69P  | Missense   | EZB |
| WSU-DLCL2 BCL2   | 596   | 18 | 60985387  | G | A | D171D | Synonymous | EZB |
| WSU-DLCL2 EZH2   | 2146  | 7  | 148508727 | T | A | Y641F | Missense   | EZB |
| WSU-DLCL2 FBXO11 | 80204 | 2  | 48066023  | C | A | E188X | Nonsense   | EZB |
| WSU-DLCL2 GNA13  | 10672 | 17 | 63010775  | A | G | F245S | Missense   | EZB |
| WSU-DLCL2 ITPKB  | 3707  | 1  | 226924292 | C | T | A290T | Missense   | ST2 |
| WSU-DLCL2 WEE1   | 7465  | 11 | 9606835   | C | T | P440L | Missense   | MCD |
